# Supplementary material for: 10-year prevalence of diagnostic and screening colonoscopy use in Germany: a claims data analysis
Source: PubMed Central journal article supplement — Eur J Cancer Prev. 2022 Jan 4;31(6):497–504. doi: 10.1097/CEJ.0000000000000736 (PMC9928559; doi:10.1097/cej.0000000000000736), 2022-01-04
Supplement: ejcp-31-497-s001.pdf [file ejcp-31-497-s001.pdf]

## **Online Supplementary Material**

**Supplemental Digital Content 1.** 10-year prevalence of colonoscopy use (overall, screening and diagnostic) in 2017 according to age in women and men.

**Supplemental Digital Content 2.** 5-year prevalence of colonoscopy use (screening and diagnostic) in 2017 according to age in women and men.

**Supplemental Digital Content 3.** Proportion of persons with a colonoscopy (overall, screening and diagnostic) in the previous 10 years and any codes indicating the presence of prevalent CRC in the 2 years prior to colonoscopy, stratified by age.

**Supplemental Digital Content 4.** Potential reasons for diagnostic colonoscopies: Prevalence of codes for relevant diagnoses, symptoms or other conditions recorded in persons before diagnostic colonoscopy.

**Supplemental Digital Content 5.** Proportion of women and men aged  $\leq 65$  years and  $>65$  years for whom no information on the educational level was available or without a formal degree.

**Supplemental Digital Content 1.** 10-year prevalence of colonoscopy use (overall, screening and diagnostic) in 2017 according to age in women and men.

|                                   | Overall<br>% (95% CI) | Type of colonoscopy     |                          |
|-----------------------------------|-----------------------|-------------------------|--------------------------|
|                                   |                       | Screening<br>% (95% CI) | Diagnostic<br>% (95% CI) |
| <b>Total</b>                      | 30.6 (30.6-30.6)      | 9.5 (9.5-9.5)           | 21.1 (21.1-21.1)         |
| <b>Women (n= 4,102,177)</b>       |                       |                         |                          |
| Total                             | 31.4 (31.4-31.5)      | 9.2 (9.2-9.2)           | 22.2 (22.2-22.3)         |
| <b>Age<sup>1</sup> (in years)</b> |                       |                         |                          |
| 10-14                             | 0.3 (0.3-0.4)         | n.a.                    | 0.3 (0.3-0.4)            |
| 15-19                             | 1.4 (1.4-1.5)         | n.a.                    | 1.4 (1.4-1.5)            |
| 20-24                             | 5.7 (5.6-5.8)         | n.a.                    | 5.7 (5.6-5.8)            |
| 25-29                             | 10.2 (10.0-10.4)      | n.a.                    | 10.2 (10.0-10.4)         |
| 30-34                             | 11.0 (10.9-11.2)      | n.a.                    | 11.0 (10.9-11.2)         |
| 35-39                             | 11.4 (11.2-11.5)      | n.a.                    | 11.4 (11.2-11.5)         |
| 40-44                             | 13.9 (13.8-14.1)      | n.a.                    | 13.9 (13.8-14.1)         |
| 45-49                             | 17.7 (17.5-17.8)      | n.a.                    | 17.7 (17.5-17.8)         |
| 50-54                             | 22.8 (22.7-22.9)      | n.a.                    | 22.8 (22.7-22.9)         |
| 55-59                             | 35.7 (35.5-35.8)      | 9.6 (9.5-9.7)           | 26.1 (26.0-26.2)         |
| 60-64                             | 46.5 (46.3-46.6)      | 22.4 (22.3-22.6)        | 24.0 (23.9-24.2)         |
| 65-69                             | 50.5 (50.3-50.6)      | 24.4 (24.3-24.5)        | 26.1 (25.9-26.2)         |
| 70-74                             | 52.2 (52.0-52.4)      | 20.5 (20.4-20.7)        | 31.7 (31.5-31.8)         |
| 75-79                             | 50.9 (50.7-51.1)      | 16.6 (16.5-16.7)        | 34.3 (34.2-34.5)         |
| 80-84                             | 46.3 (46.1-46.5)      | 11.4 (11.3-11.5)        | 34.9 (34.7-35.0)         |
| 85-89                             | 37.7 (37.4-38.0)      | 6.1 (5.9-6.2)           | 31.7 (31.4-31.9)         |
| 90-94                             | 29.1 (28.7-29.5)      | 2.9 (2.7-3.0)           | 26.2 (25.9-26.6)         |
| 95-99                             | 20.5 (19.9-21.2)      | 1.2 (1.0-1.4)           | 19.3 (18.6-19.9)         |
| 100-104                           | 12.2 (10.2-14.2)      | 0.1 (0.0-0.3)           | 12.1 (10.1-14.1)         |
| ≥ 105                             | 2.6 (0.0-6.1)         | 1.3 (0.0-3.8)           | 1.3 (0.0-3.8)            |
| <b>Men (n= 3,373,491)</b>         |                       |                         |                          |
| Total                             | 29.6 (29.6-29.7)      | 9.9 (9.8-9.9)           | 19.7 (19.7-19.8)         |
| <b>Age<sup>1</sup> (in years)</b> |                       |                         |                          |
| 10-14                             | 0.4 (0.4-0.5)         | n.a.                    | 0.4 (0.4-0.5)            |
| 15-19                             | 1.0 (1.0-1.1)         | n.a.                    | 1.0 (1.0-1.1)            |
| 20-24                             | 3.2 (3.1-3.3)         | n.a.                    | 3.2 (3.1-3.3)            |
| 25-29                             | 5.8 (5.6-5.9)         | n.a.                    | 5.8 (5.6-5.9)            |
| 30-34                             | 7.7 (7.6-7.8)         | n.a.                    | 7.7 (7.6-7.8)            |
| 35-39                             | 9.5 (9.4-9.7)         | n.a.                    | 9.5 (9.4-9.7)            |
| 40-44                             | 12.0 (11.8-12.2)      | n.a.                    | 12.0 (11.8-12.1)         |
| 45-49                             | 15.5 (15.3-15.6)      | n.a.                    | 15.5 (15.3-15.6)         |
| 50-54                             | 20.6 (20.5-20.7)      | n.a.                    | 20.6 (20.5-20.7)         |
| 55-59                             | 33.2 (33.0-33.3)      | 9.6 (9.5-9.7)           | 23.6 (23.4-23.7)         |
| 60-64                             | 44.2 (44.0-44.4)      | 23.1 (23.0-23.3)        | 21.1 (20.9-21.2)         |
| 65-69                             | 49.2 (49.0-49.4)      | 25.8 (25.6-25.9)        | 23.4 (23.3-23.6)         |
| 70-74                             | 52.6 (52.4-52.8)      | 22.9 (22.8-23.1)        | 29.6 (29.5-29.8)         |
| 75-79                             | 54.1 (53.9-54.3)      | 19.6 (19.5-19.8)        | 34.5 (34.3-34.7)         |
| 80-84                             | 51.7 (51.4-51.9)      | 14.8 (14.6-15.0)        | 36.9 (36.7-37.1)         |
| 85-89                             | 44.7 (44.4-45.1)      | 9.2 (9.0-9.4)           | 35.5 (35.2-35.9)         |
| 90-94                             | 36.7 (36.1-37.4)      | 5.5 (5.2-5.8)           | 31.3 (30.7-31.9)         |
| 95-99                             | 27.6 (26.2-29.1)      | 3.1 (2.5-3.6)           | 24.6 (23.2-26.0)         |
| 100-104                           | 13.1 (7.9-18.4)       | 0.6 (0.0-1.8)           | 12.5 (7.4-17.6)          |
| ≥ 105                             | 13.3 (0.0-30.5)       | 0.0 (0.0-0.0)           | 13.3 (0.0-30.5)          |

CI= confidence interval; n.a.= not applicable

<sup>1</sup>Age in year 2017

**Supplemental Digital Content 2.** 5-year prevalence of colonoscopy use (screening and diagnostic) in 2017 according to age in women and men.

**Women:**

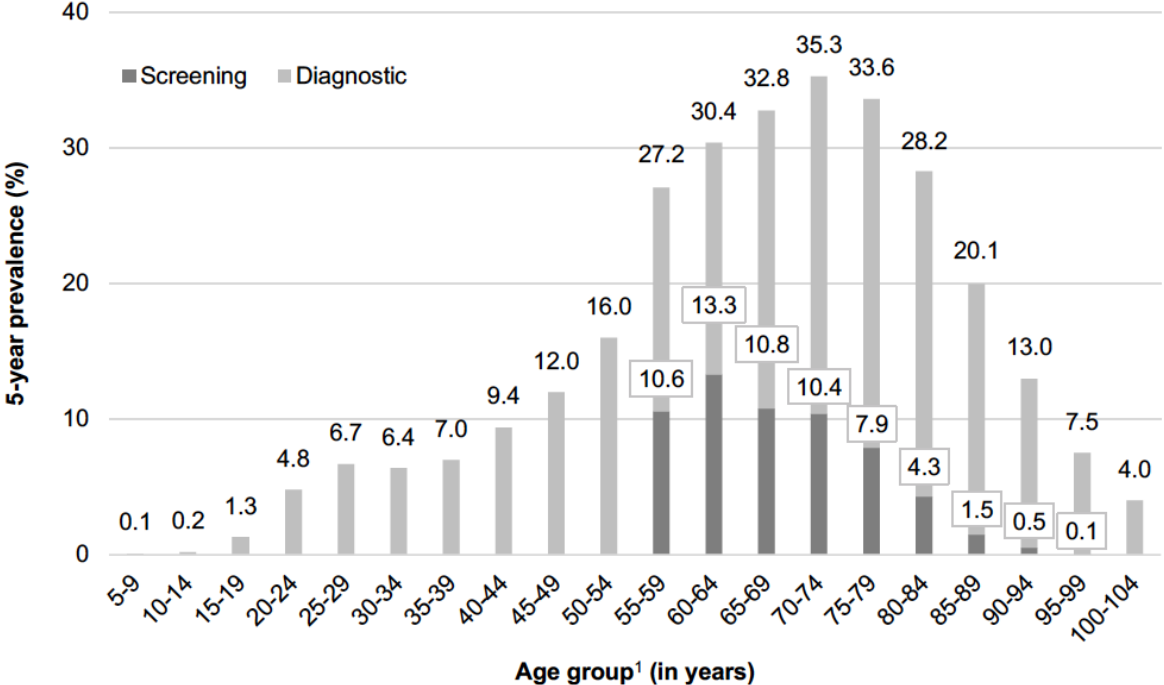

<sup>1</sup>Age in 2017

**Men:**

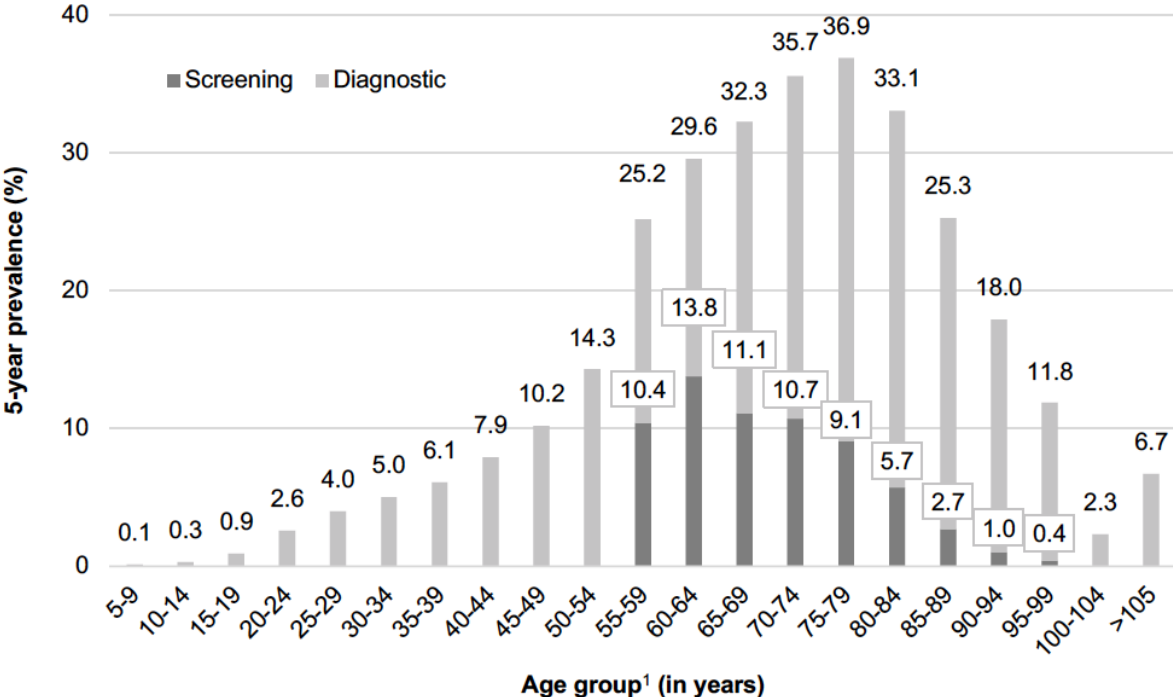

<sup>1</sup>Age in 2017

**Supplemental Digital Content 3.** Proportion of persons with a colonoscopy (overall, screening and diagnostic) in the previous 10 years and any codes indicating the presence of prevalent CRC in the 2 years prior to colonoscopy, stratified by age.

|                                   | Overall<br>N (%) | Type of colonoscopy |                     |
|-----------------------------------|------------------|---------------------|---------------------|
|                                   |                  | Screening<br>N (%)  | Diagnostic<br>N (%) |
| <b>Total</b>                      | 77,378 (3.4)     | 10,434 (1.5)        | 66,944 (4.2)        |
| <b>Age<sup>1</sup> (in years)</b> |                  |                     |                     |
| 10-24                             | 39 (0.2)         | n.a.                | 39 (0.2)            |
| 25-29                             | 36 (0.2)         | n.a.                | 36 (0.2)            |
| 30-34                             | 79 (0.3)         | n.a.                | 79 (0.3)            |
| 35-39                             | 202 (0.5)        | n.a.                | 202 (0.5)           |
| 40-44                             | 300 (0.6)        | n.a.                | 300 (0.6)           |
| 45-49                             | 783 (0.9)        | n.a.                | 783 (0.9)           |
| 50-54                             | 1,984 (1.1)      | n.a.                | 1,984 (1.1)         |
| 55-59                             | 3,479 (1.3)      | 380 (0.5)           | 3,099 (1.6)         |
| 60-64                             | 5,141 (1.6)      | 1,064 (0.7)         | 4,077 (2.6)         |
| 65-69                             | 8,963 (2.9)      | 2,063 (1.3)         | 6,900 (4.4)         |
| 70-74                             | 13,151 (4.5)     | 2,477 (2.0)         | 10,674 (6.2)        |
| 75-79                             | 19,850 (5.4)     | 2,736 (2.2)         | 17,114 (7.1)        |
| ≥80                               | 23,371 (7.4)     | 1,714 (2.4)         | 21,657 (8.8)        |

CI= confidence interval; n.a.= not applicable

<sup>1</sup>Age in 2017

**Supplemental Digital Content 4.** Potential reasons for diagnostic colonoscopies: Prevalence of codes for relevant diagnoses, symptoms or other conditions recorded in persons before diagnostic colonoscopy.

|                                            | <b>Diagnostic colonoscopy</b><br>(n= 1,576,672) |
|--------------------------------------------|-------------------------------------------------|
|                                            | N (%)                                           |
| <b>Diagnoses or symptoms<sup>1,2</sup></b> |                                                 |
| Abnormal weight loss                       | 46,832 (2.97)                                   |
| Acute abdominal pain                       | 428,382 (27.17)                                 |
| Anemia                                     | 103,742 (6.58)                                  |
| Crohn's disease and/or ulcerative colitis  | 74,733 (4.74)                                   |
| Diverticulosis                             | 482,526 (30.60)                                 |
| Diverticulosis with bleeding               | 17,448 (1.11)                                   |
| Faecal abnormalities                       | 37,234 (2.36)                                   |
| Faecal occult blood test                   | 232,924 (14.77)                                 |
| Hemorrhage of anus and rectum              | 57,346 (3.64)                                   |
| Irritable bowel syndrome                   | 105,444 (6.69)                                  |
| Unspecified gastrointestinal bleedings     | 89,909 (5.70)                                   |
| Any of the above                           | 1,109,454 (70.37)                               |

<sup>1</sup> Within the same quarter or the quarter before the diagnostic colonoscopy.

<sup>2</sup> More than one code for diagnosis or symptom per person possible.

**Supplemental Digital Content 5.** Proportion of women and men aged  $\leq 65$  years and  $>65$  years for whom no information on the educational level was available or without a formal degree.

|                          | <b>Age <math>\leq 65</math><sup>1</sup></b> | <b>Age <math>&gt;65</math><sup>1</sup></b> |
|--------------------------|---------------------------------------------|--------------------------------------------|
|                          | %                                           | %                                          |
| <b>Women</b>             |                                             |                                            |
| <b>Educational level</b> |                                             |                                            |
| Degree unknown/missing   | 13.8                                        | 88.2                                       |
| No formal degree         | 0.1                                         | 0.0                                        |
| <b>Men</b>               |                                             |                                            |
| <b>Educational level</b> |                                             |                                            |
| Degree unknown/missing   | 13.3                                        | 73.7                                       |
| No formal degree         | 0.2                                         | 0.0                                        |

<sup>1</sup>Age in 2017
